# Supplementary material for: The economic costs of planting, preserving, and managing the world’s forests to mitigate climate change
Source: Springer Nature journal article supplement (doi:10.1038/s41467-020-19578-z), 2020-12-01
Supplement: 41467_2020_19578_MOESM1_ESM.pdf [file 41467_2020_19578_MOESM1_ESM.pdf]

1 Supplementary Information for “The economic costs of  
2 planting, preserving, and managing the world's forests to  
3 mitigate climate change”

4

5 Austin et al.

6

7

8

9

10

11

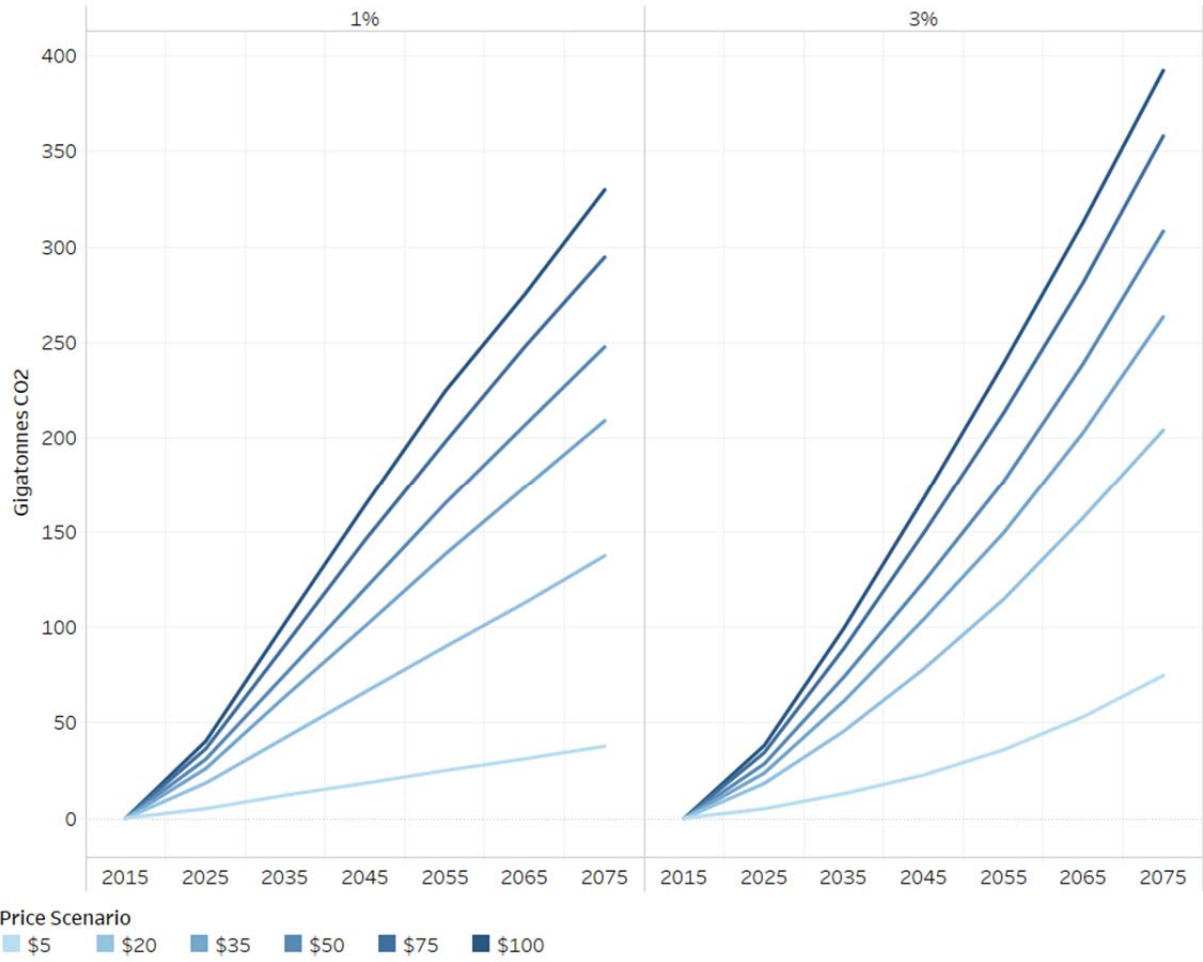

12

13 **Supplementary Figure 1. Cumulative GHG mitigation across all modelled abatement activities in the global forest sector 2015**  
 14 **- 2075, across carbon price and growth scenarios (all mitigation levels are projected relative to the same baseline simulation**  
 15 **with no mitigation incentive).**

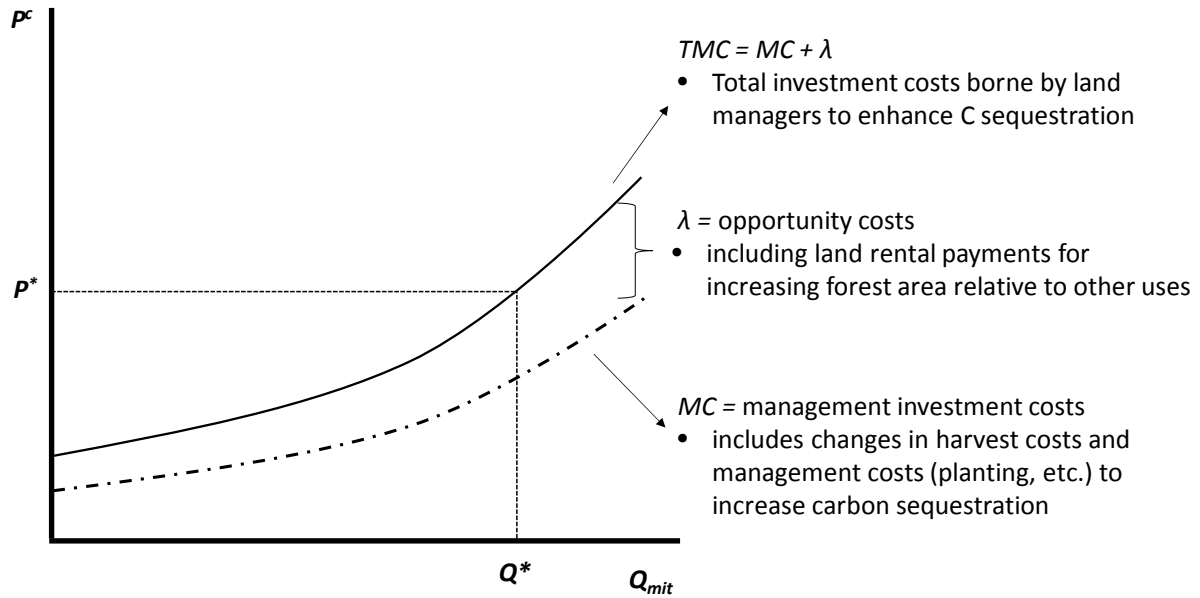

16  
 17 **Supplementary Figure 2. Conceptual diagram depicting different sources of costs borne by land managers and comparison to**  
 18 **total mitigation costs for a specific price and quantity threshold ( $P^* \cdot Q^*$ )**

19  
 20  
 21  
 22  
 23  
 24  
 25  
 26  
 27
